# Supplementary material for: Xenogeneic Graft-Versus-Host Disease in Humanized NSG and NSG-HLA-A2/HHD Mice
Source: Front Immunol. 2018 Aug 30;9:1943. doi: 10.3389/fimmu.2018.01943 (PMC6125392; doi:10.3389/fimmu.2018.01943)
Supplement: Supplementary file 5 [file Table_5.XLS]

## Sheet: Sheet1
Supplemental Table 5. List of the 165 genes (published by Datlinger et al.) used as gene set to compare the TCR signaling signature in GSEA.
BCL7A	ERGIC1	SKA3	HOXA7	DNAJC1	DIAPH1	SLTM	HDHD1	H3F3B	GATA3	HSPA5
CEP70	CBX3P9	C1orf21	TACC3	CHD2	MAP2K3	CD2	EIF1B	LAX1	PKM	CD82
NKX3-1	FAM111B	EIF2B4	TMEM237	NAP1L1	HLA-E	YBX3	SEMA4D	CD28	IER3	HSP90B1
MZB1	C21orf58	SLC29A1	SLC9A3R1	ARF6	TOX	TRBC2	PTPN7	ARAP2	HIST1H1D	CD69
UBTF	CENPM	FARSA	SYNGR2	LIMD2	TPM3	CCDC186	ANTXR2	OSBPL3	MALAT1	TRAC
ZFP36L2	ESCO2	GYPC	ISG15	AQP3	RAB8B	DUSP2	PHF19	BACH2	CLEC2B
MYC	CARHSP1	CD3EAP	DKC1	SCN3A	ZKSCAN1	ZC3HAV1	LPIN1	BTG1	PTPRE
ADA	MAP1A	CDCA7L	SLC3A2	FGFR1OP2	TAF1D	N4BP2	TPT1	WNK1	ATP2B1
FADS1	MUM1	SLC25A6	TAX1BP1	EMP3	JARID2	RAP1A	SDCBP	SECISBP2L	ANXA1
SLBP	GLUL	QPRT	RBMS1	NDFIP1	ASNS	USP15	NAMPT	EEF1A1	MTATP6P1
CCNE2	GLRX	MID1IP1	ARL4C	FXYD2	EDEM1	MANF	HLA-B	SSFA2	SOX4
SNORA76C	PPP1R14B	MAP7D1	ELF1	VMP1	PTPN11	CD3D	MYB	CLIC1	PTPRC
USP1	IGFBP2	BID	PGM2L1	STT3B	ATP6V1B2	PHLDA1	JMJD1C	SLFN5	SLA
UHRF1	KLHDC3	TCOF1	PPIA	LCP2	ARFGEF1	PTPN6	STK17B	DDIT3	ZFP36L1
PCNA	CENPV	PMEPA1	SUV420H1	SH3BGRL3	SETX	MIR4435-1HG	IER2	LINC00152	SCG2
SRSF7	UNG	TSPAN7	PRDM8	IREB2	EIF1	SLC7A5	ANKRD28	HIVEP3	VIM
